# Supplementary material
Source: PubMed Central journal article supplement (PMC3837974)
Supplement: IAI.00724-13_zii999090414so1.pdf [file IAI.00724-13_zii999090414so1.pdf]

**Table S1 Clinical Isolates Used in this Study**

| <b>Serotype</b> | <b>Isolates tested (#)</b> | <b>Site of Isolation</b> |
|-----------------|----------------------------|--------------------------|
| <b>3</b>        | 3                          | Massachusetts, USA       |
| <b>4</b>        | 3                          | Arizona, Israel          |
| <b>6A/C</b>     | 7                          | Massachusetts, USA       |
| <b>6B</b>       | 3                          | Massachusetts, USA       |
| <b>7F</b>       | 1                          | Massachusetts, USA       |
| <b>9A</b>       | 1                          | Massachusetts, USA       |
| <b>9V</b>       | 1                          | Massachusetts, USA       |
| <b>10A</b>      | 6                          | Massachusetts, USA       |
| <b>11A</b>      | 10                         | Massachusetts, USA       |
| <b>14</b>       | 3                          | Massachusetts, USA       |
| <b>15A</b>      | 8                          | Massachusetts, USA       |
| <b>15B</b>      | 6                          | Massachusetts, USA       |
| <b>15C</b>      | 6                          | Massachusetts, USA       |
| <b>15F</b>      | 1                          | Massachusetts, USA       |
| <b>16F</b>      | 1                          | Massachusetts, USA       |
| <b>17F</b>      | 1                          | Massachusetts, USA       |
| <b>18C</b>      | 1                          | Massachusetts, USA       |
| <b>19A</b>      | 13                         | Massachusetts, USA       |
| <b>19F</b>      | 11                         | Massachusetts, USA       |
| <b>22F</b>      | 8                          | Massachusetts, USA       |
| <b>23A</b>      | 11                         | Massachusetts, USA       |
| <b>23B</b>      | 5                          | Massachusetts, USA       |
| <b>23F</b>      | 4                          | Massachusetts, USA       |
| <b>31</b>       | 1                          | Massachusetts, USA       |
| <b>34</b>       | 3                          | Massachusetts, USA       |
| <b>33F</b>      | 3                          | Massachusetts, USA       |
| <b>35B</b>      | 13                         | Massachusetts, USA       |
| <b>35F</b>      | 4                          | Massachusetts, USA       |
| <b>38</b>       | 2                          | Massachusetts, USA       |

**Figure S1**

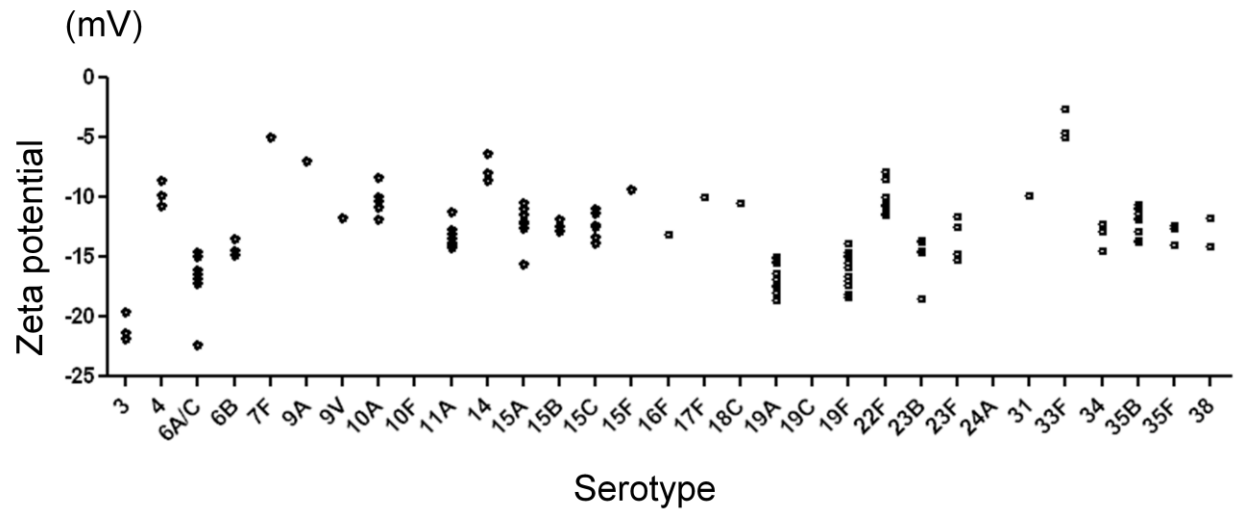

**Figure S1** Zeta potential of clinical isolates used in this study. Each dot represents one isolate and the corresponding serotype is shown on the horizontal axis. The mean value of isolates within same serotype was used in the study as a representative zeta potential for the serotype.

Figure S2

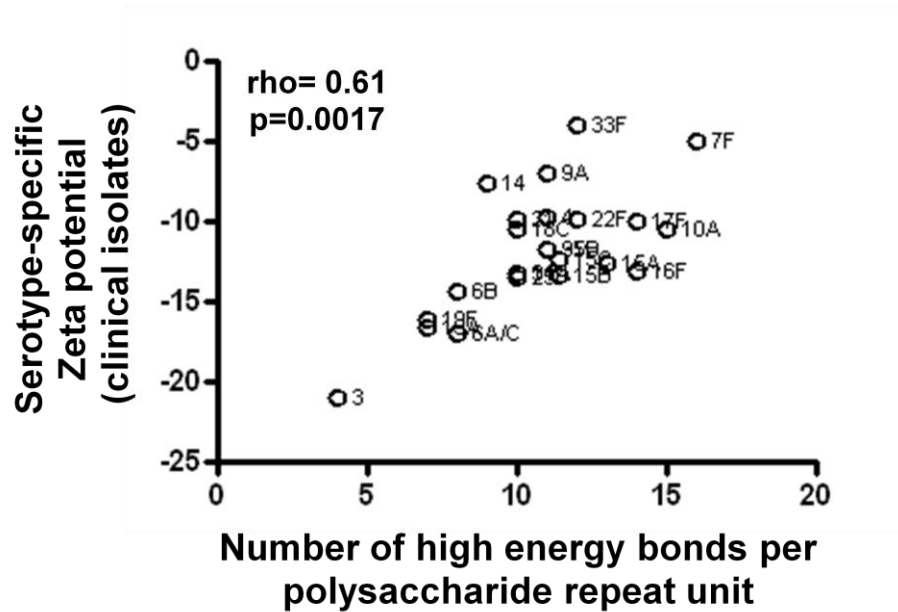

**Figure S2** Correlation between number of high energy bonds required to generate one polysaccharide repeat unit and serotype-specific zeta potential. Energy/ repeat unit was obtained by analyzing known capsular polysaccharide structures and published in a previous study (Weinberger et al, PLoS Pathog 5(6): e1000476). Spearman's rank correlation coefficient ( $\rho$ ) and the associated p value ( $p$ ) are shown.
